# Supplementary material for: PHA-665752’s Antigrowth and Proapoptotic Effects on HSC-3 Human Oral Cancer Cells
Source: MDPI journal article supplement (doi:10.3390/ijms25052871), 2024-03-01
Supplement: s1 [file s1]

**Table S1: List of antibodies used for Western blot analysis.**

| <b>Antibodies</b>                  | <b>Dilution used</b> | <b>Source</b>                          | <b>Catalog no.</b> |
|------------------------------------|----------------------|----------------------------------------|--------------------|
| <i><b>Primary antibodies</b></i>   |                      |                                        |                    |
| p-cMET (Tyr1234/1235)              | 1:2,000              | Cell signaling                         | 3077               |
| MET                                | 1:2000               | Cell signaling                         | 3127               |
| Mcl-1                              | 1:2,000              | Cell signalling                        | Sc819              |
| Bcl-2                              | 1:2,000              | Santa Cruz Biotechnology               | sc-509             |
| p-Src (Y416)                       | 1:2,000              |                                        | 2101               |
| Src                                | 1:2,000              | Cell signalling                        | 2108               |
| p-PKB (S473)                       | 1:2,000              | Cell signalling                        | 9271               |
| p-PKB (Thr308)                     | 1:2,000              | Abcam                                  | 9275               |
| PKB                                | 1:2,000              | Cell signalling                        | 9272               |
| p-mTOR (S2448)                     | 1:2,000              | Cell signalling                        | 2971               |
| mTOR                               | 1:2,000              | Cell signaling                         | 2983               |
| p-EGFR (Tyr 1068)                  | 1:2,000              | Cell signaling                         | 2234               |
| EGFR                               | 1:2,000              | Cell signaling                         | 2246               |
| p-ERK1/2                           | 1:2,000              | Cell signling                          | 9101               |
| (Thr202/Tyr204)                    |                      |                                        |                    |
| ERK                                | 1:2,000              | Cell signaling                         | 9102               |
| HIF-1 $\alpha$                     | 1:2,000              | BD Biosciences                         | 610958             |
| HIF-1 $\beta$                      | 1:2,000              | Santa Cruz Biotechnology               | sc-17811           |
| $\beta$ -Actin                     | 1:10,000             | Sigma                                  | A5441              |
| <i><b>Secondary antibodies</b></i> |                      |                                        |                    |
| Goat anti-rabbit IgG-<br>HRP       | 1:5000               | Jackson ImmunoResearch<br>Laboratories | 111-035-045        |
| Goat anti-mouse-IgG-<br>HRP        | 1:5000               | Jackson ImmunoResearch<br>Laboratories | 115-035-062        |
